# Supplementary material
Source: PubMed Central journal article supplement (PMC10197197)
Supplement: NIHMS1891494-supplement-1.pdf [file NIHMS1891494-supplement-1.pdf]

## Supplemental information

### **Dual Immunostimulatory Pathway Agonism through a Synthetic Nanocarrier Triggers Robust Anti-Tumor Immunity in Murine Glioblastoma**

Sophie Lugani<sup>1,2\*</sup>, Elias A. Halabi<sup>1\*</sup>, Juhyun Oh<sup>1</sup>, Rainer Kohler<sup>1</sup>, Hannah Peterson<sup>1</sup>,  
Xandra O. Breakefield<sup>3,4</sup>, E. Antonio A. Chiocca<sup>5</sup>, Miles A. Miller<sup>1</sup>, Christopher Garris<sup>1#</sup>,  
Ralph Weissleder<sup>1,3,5,6#</sup>

\* equal contributions

<sup>1</sup> Center for Systems Biology, Massachusetts General Hospital, 185 Cambridge St,  
CPZN 5206, Boston, MA 02114

<sup>2</sup> Medical Faculty, Heidelberg University, Im Neuenheimer Feld 672, 69120 Heidelberg

<sup>3</sup> Department of Radiology, Massachusetts General Hospital, and Harvard Medical  
School, Boston, MA

<sup>4</sup> Department of Neurology, Massachusetts General Hospital, and Harvard Medical  
School, Boston, MA

<sup>5</sup> Department of Neurosurgery, Brigham and Women Hospital, and Harvard Medical  
School, Boston, MA

<sup>6</sup> Department of Systems Biology, Harvard Medical School, 200 Longwood Ave, Boston,  
MA 02115

#Ralph Weissleder, MD, Ph.D. (contact)  
Center for Systems Biology  
Massachusetts General Hospital  
185 Cambridge St, CPZN 5206  
Boston, MA, 02114  
617-726-8226  
[rweissleder@mgh.harvard.edu](mailto:rweissleder@mgh.harvard.edu)

**Fig. S1. Synthesis and characterization of CANDIs.** **A.** Schematic depiction of the synthesis, fluorescent labeling and loading of selected therapeutic payloads (LCL-161 & R848) in CANDIs. **B.** CANDI study groups (controls top, therapies bottom). **C.** Dynamic light scattering (DLS) measurement of the hydrodynamic diameter of CANDI with an average size of  $d = 27 \pm 4$  nm ( $N = 3$ ) and zeta potential measurement of the surface charge of CANDI with an average charge of  $\zeta = -9.56$  mW ( $N = 3$ ), measured in PBS (0.01x). **D.** Normalized absorption and emission spectra of CANDI, CANDI-PB (blue) & CANDI-AF647 (orange) depicting excitation and emission maxima ( $\lambda_{ex}$ ,  $\lambda_{em}$ , PBS 1x,  $N = 3$ ).

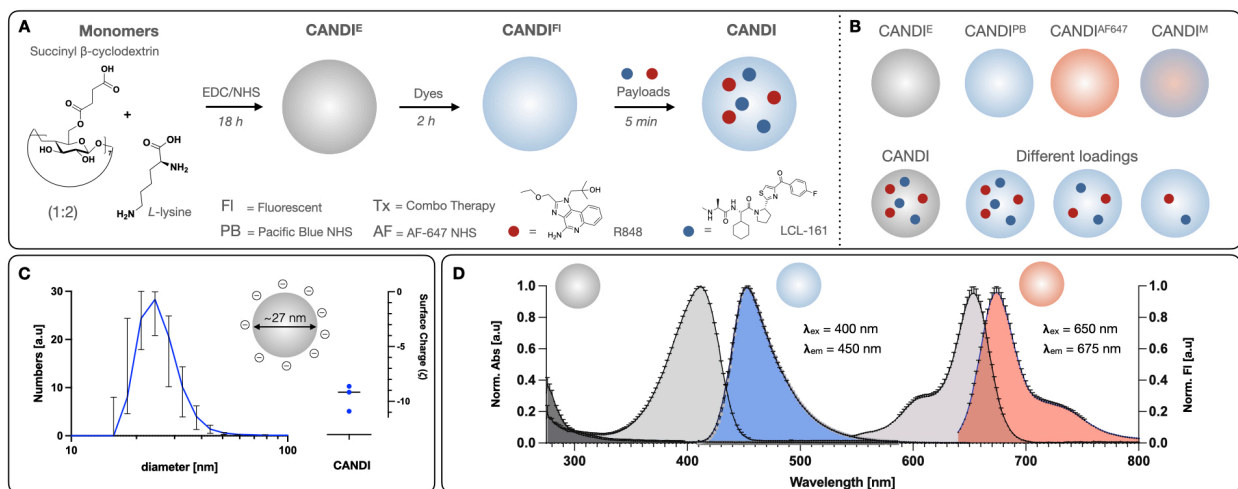

**Fig. S2. Loading and release kinetics of CANDIs.** **A.** Schematic depiction of loading experiments using phenolphthalein as indicator (**P**, pH = 10.5). In its deprotonated form, **P** exhibits high absorption at 550 nm ( $\lambda_{\max}$ ). Upon interaction with the cyclodextrin (CD) units contained in/on the CANDI, **P** undergoes a spirocyclization depleting its absorbance (**P**→No drug). Signal recovery is obtained by displacement of the indicator **P** by addition of i) R848 alone (0.2 mg) 21.14%, ii) LCL-161 alone (0.5 mg) 57.60% and iii) R848 (0.2 mg) plus LCL-161 (0.5 mg), 85% (N = 3, P = 0.0068). **B.** Release experiments determined by DLS measurements comparing unloaded CANDI (solid black line) to a loaded CANDI (blue, payloads) at a loading concentration of 5 mg CANDI in 100  $\mu$ L PBS. An increase in size of  $d \sim 10$  nm is evident upon loading. Release of the loaded payloads and shrinking of CANDI to its unloaded size (orange) was achieved after 24 h dialysis (3k, PBS, 0.01x) and statistical analysis of the mean distribution of particle size (N = 3, P = 0.0047). **C.** Standard curve to estimate payload concentration from ELSD signal intensity (left) and release kinetics of R848 and LCL-161 with an estimated half-life of  $0.5 \pm 0.32$  h and  $1.4 \pm 0.5$  h and  $\sim 77\%$  and  $78\%$  release respectively after membrane filtration assays in PBS at  $37^\circ\text{C}$  for 18 h (N =

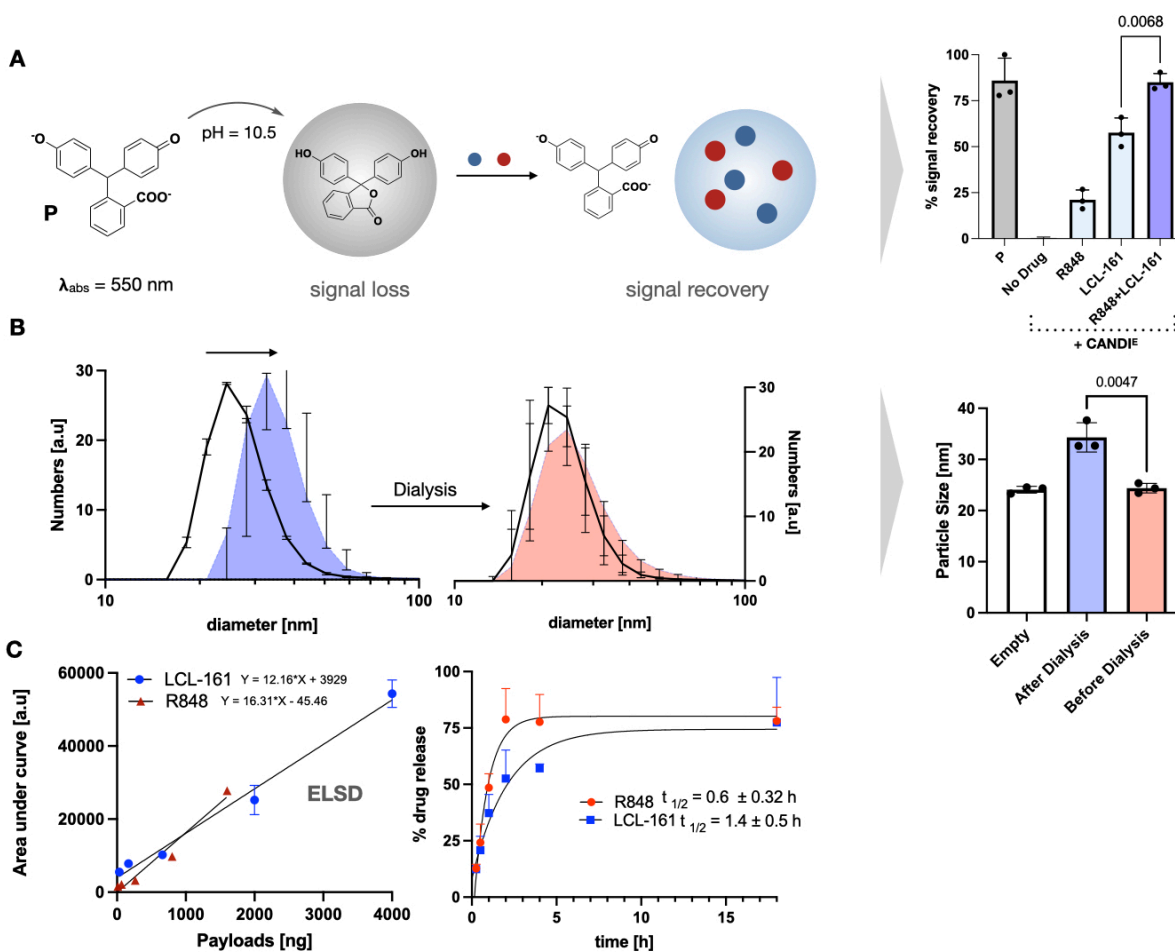

3).

**Fig. S3. Additional characterization of CANDI.** **A.** Scanning electron microscopy images of CANDI-tx coated in a ~8 nm gold layer (Scale bars = 10  $\mu$ m left, and 100 nm right). **B.** Nanoparticle tracking analysis of CANDI<sup>E</sup> and CANDI solutions showing size distributions, homogeneity, and estimated particle concentration for in vivo dose. Scale bars for panel A = 10  $\mu$ m (left) and 100 nm (right). **C.** Transmission electron microscopy images of CANDI negative stained with uranyl acetate (Scale bar = 50 nm).

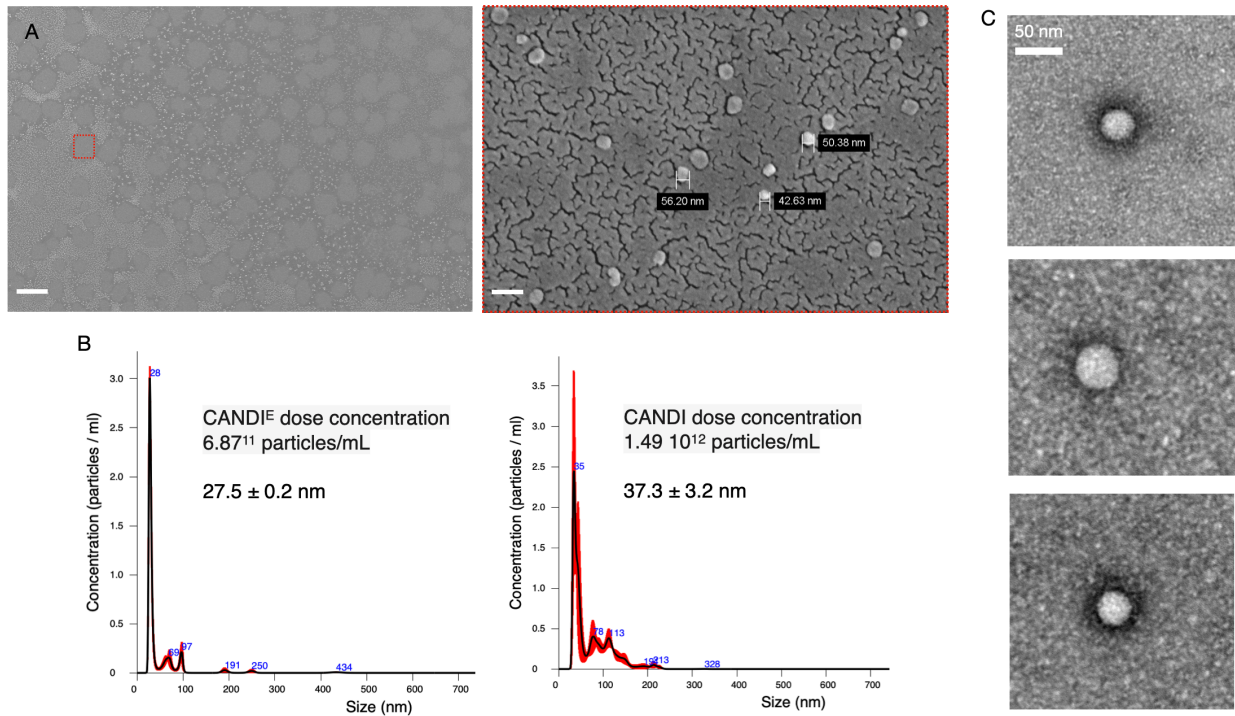



**Fig. S4: X-ray photoelectron spectroscopy analysis of CANDI<sup>E</sup> and CANDI. A.** survey scans confirm the presence of S and F atoms in the loaded CANDI and **B.** C 1s narrow scan exhibits enhanced aliphatic and aromatic binding energies correlating to the loaded payloads.

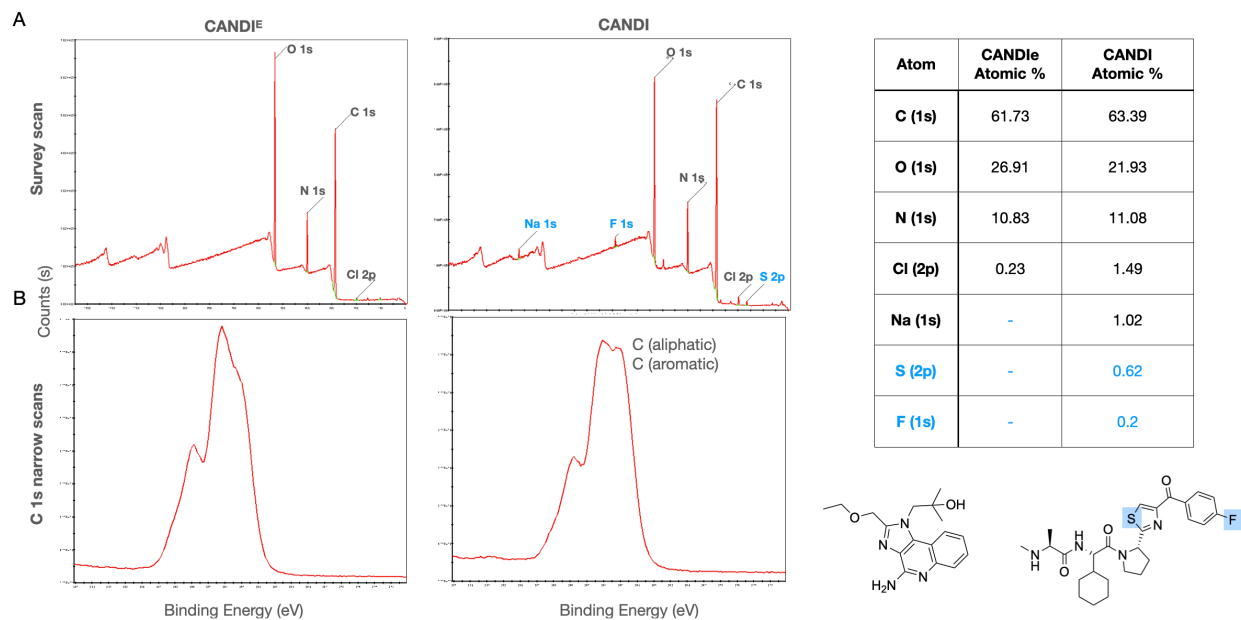

**Fig. S5: Attenuated total reflectance (ATR) Fourier-transform infrared spectroscopy (FTIR) comparison of CANDI<sup>E</sup> vs CANDI.** The spectral mathematical correction, revealed absorbance bands that correlate to the vibrations of functional groups contained in each loaded payloads (R848 and LCL-161).

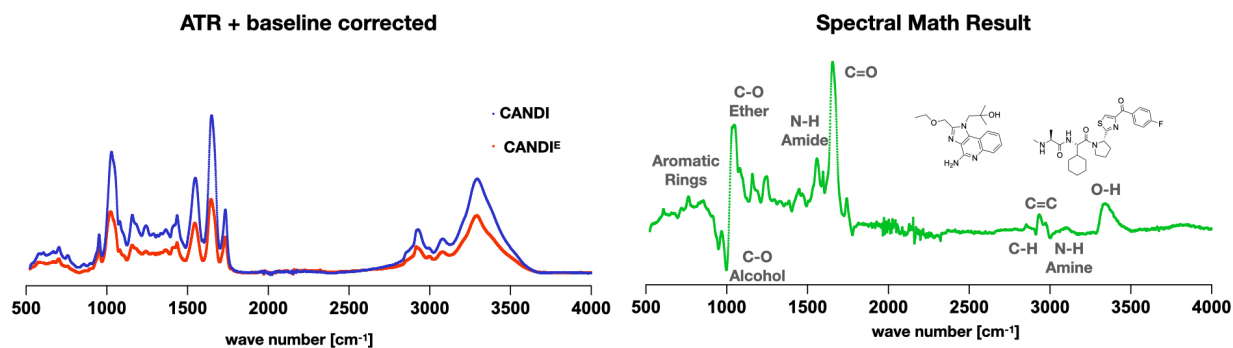

**Fig. S6:  $^1\text{H-NMR}$  spectra in  $\text{D}_2\text{O}$ .** **A.** CANDI<sup>E</sup> (5 mg) and **B.** CANDI (5 mg) loaded with a 1:1 mixture of LCL-161 and R-848. The zoomed-in aromatic region of the 2D COSY-NMR spectrum indicates the coupling between the aromatic protons and allows the identification of each aromatic proton respective to the loaded drugs (red numbers). The integrals of each peak confirm a 1:1 mixture of the solubilized drugs, suggesting that both drugs can form complexes with the CD units of the CANDI that make them soluble in  $\text{D}_2\text{O}$ . **C.** Turbidity experiments of payload solution (6 mM, PBS) dissolved in 5 mg CANDI (left) and the same solution without CANDI (right) showing colloidal dispersion and aggregation of the payloads in the absence of the CANDI vehicle.

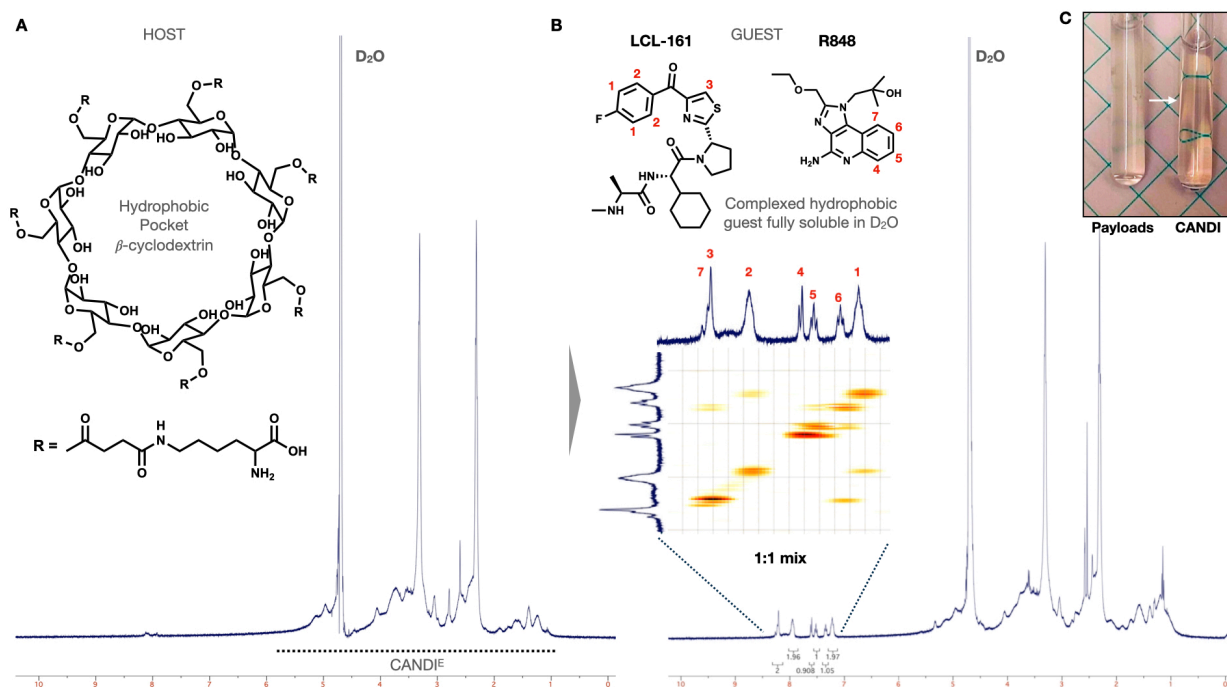

**Fig. S7: Characterization of the loaded drugs by liquid chromatography and mass spectrometry (LC-MS). A.** (Top) Chromatogram (water + acetonitrile with 0.1% formic acid) of a 2:3 mixture of reference compounds R848 and LCL-161 respectively in DMSO. Retention times for R848 and LCL-161 were  $t = 0.49$  min and  $0.8$  min, respectively. (Bottom) Chromatograms of the unloaded CANDI (black) vs. loaded CANDI with R848 and LCL-161 (red). A relative shift in the retention time of the CANDI was observed, possibly due to complexation with the hydrophobic drugs. The retention times of the complexed drugs matched those of the reference run. The identity of the loaded drugs was also characterized by **B.** their mass-to-charge ratio ( $ES^+$ )  $M^+ = 315$  and  $501$  and **C.** absorbance spectra for the respective peaks (\* & \*\*) obtained from the LC-MS chromatogram in panel A.

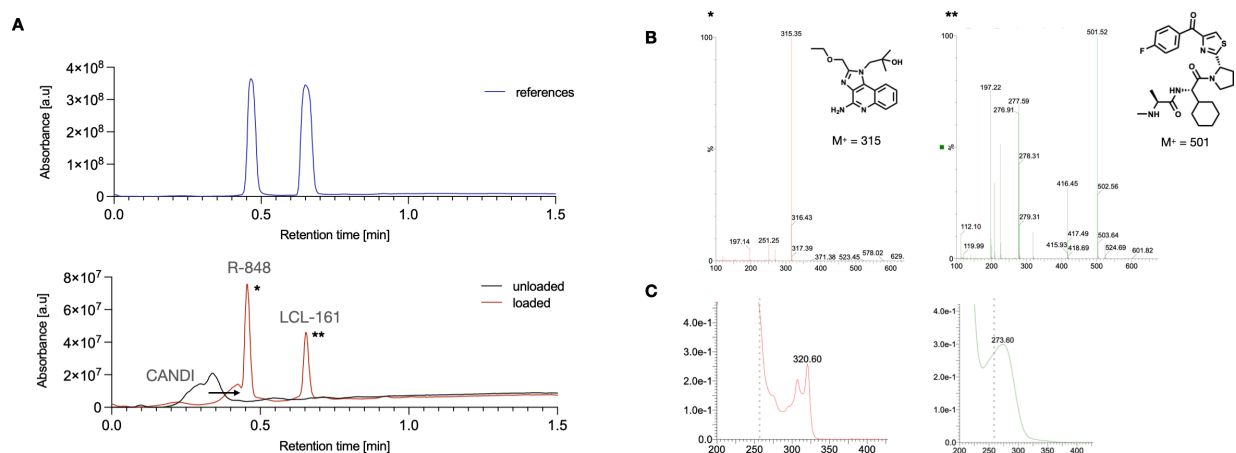

**Fig. S8: Effect of CANDI dose on the cellular accumulation in window chamber model.** All CANDI<sup>AF647</sup> doses were given IV, and the tumor microenvironment was imaged 24 h later (scale bar = 50  $\mu$ m). Images in each row have the same window and level setting. Note that cellular accumulation occurs even at very low doses (doses are given per mouse, i.e., 1 mg = 40 mg/kg).

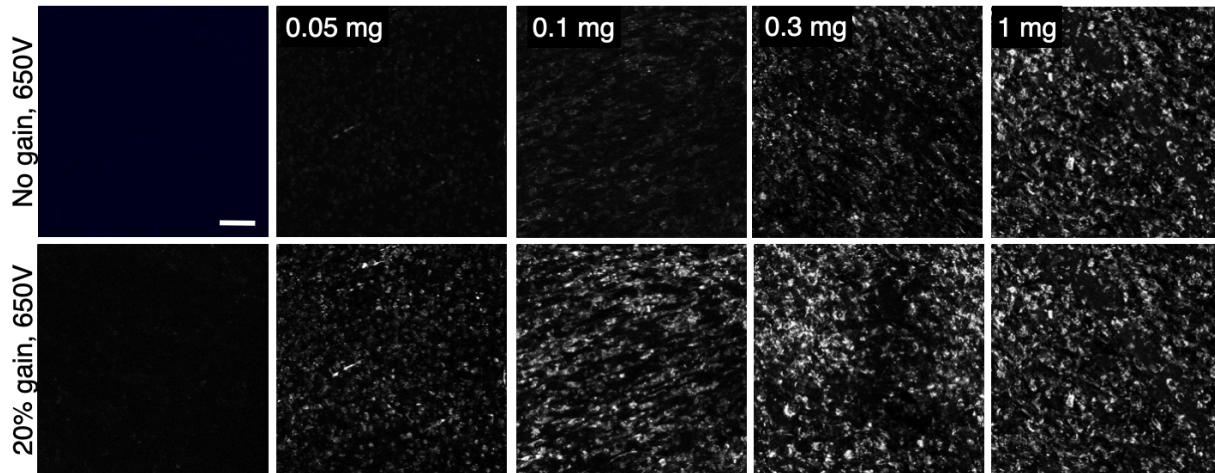

**Fig. S9: Brain-tumor distribution of CANDI.** Low magnification fluorescence images of resected brains (green autofluorescence) containing CT2A tumors (red) and CANDI<sup>AF647</sup> (white). Merge represents a combination of the CANDI and CT2A channels. Note the high tumoral accumulation of CANDI. Scale bar = 2 mm.

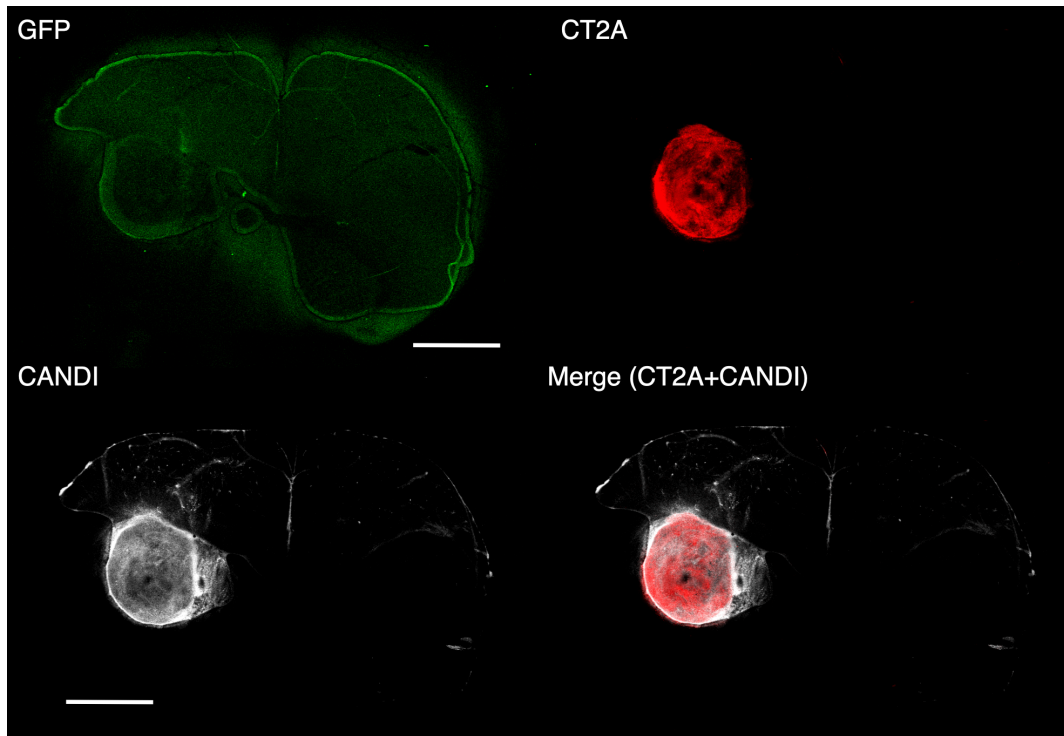

**Fig. S10: Flow cytometry of tissues with highest CANDI accumulation.** Tissues were isolated from mice treated with CANDI<sup>AF647</sup> and processed into single-cell suspensions for flow cytometry analysis. Data are expressed as mean fluorescent intensity of AF647 in each respective cellular population indicated. **A.** GBM CT2A (N = 4) **B.** cervical lymph node (N = 3). Note the increased uptake of CANDI into macrophage and DC subtypes.

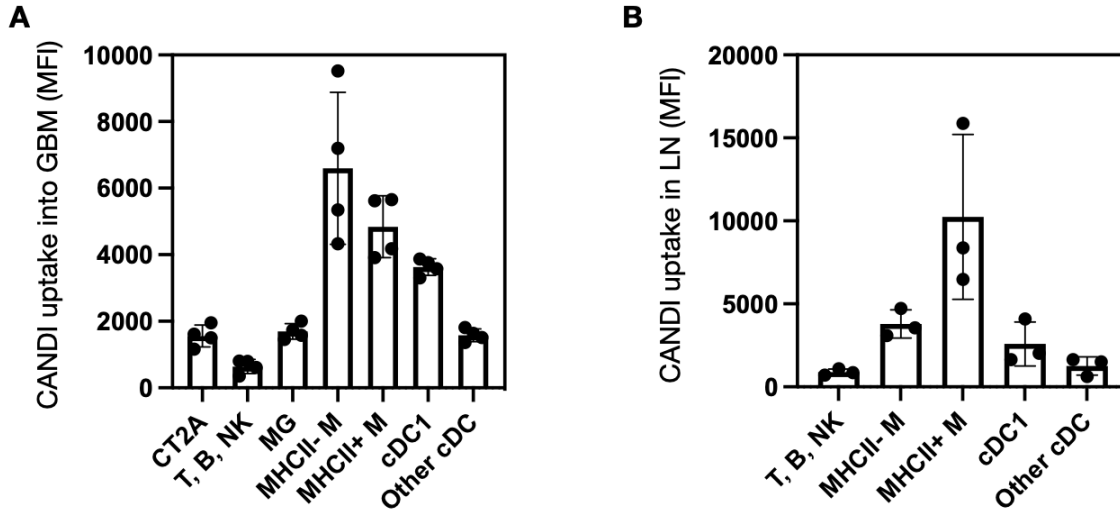



**Fig. S11: Multiplexed FAST cycling method used for tissue analysis. A.** Frozen tumor sections were incubated with FAST-reagent labeled antibodies, quenched, and then restained for multiple cycles. Image analysis was performed on multiple files of view from multiple animals (for data, see **Fig. 8**). **B.** Schematic diagram of the TCO containing FAST linker between a given antibody and the fluorochrome. The TCO allowed efficient quenching of the affinity ligands once bound to tissue. For\_ESI-MS and  $^1\text{H}$  NMR of the linker and BHQ3-Tz, see<sup>[63]</sup>.

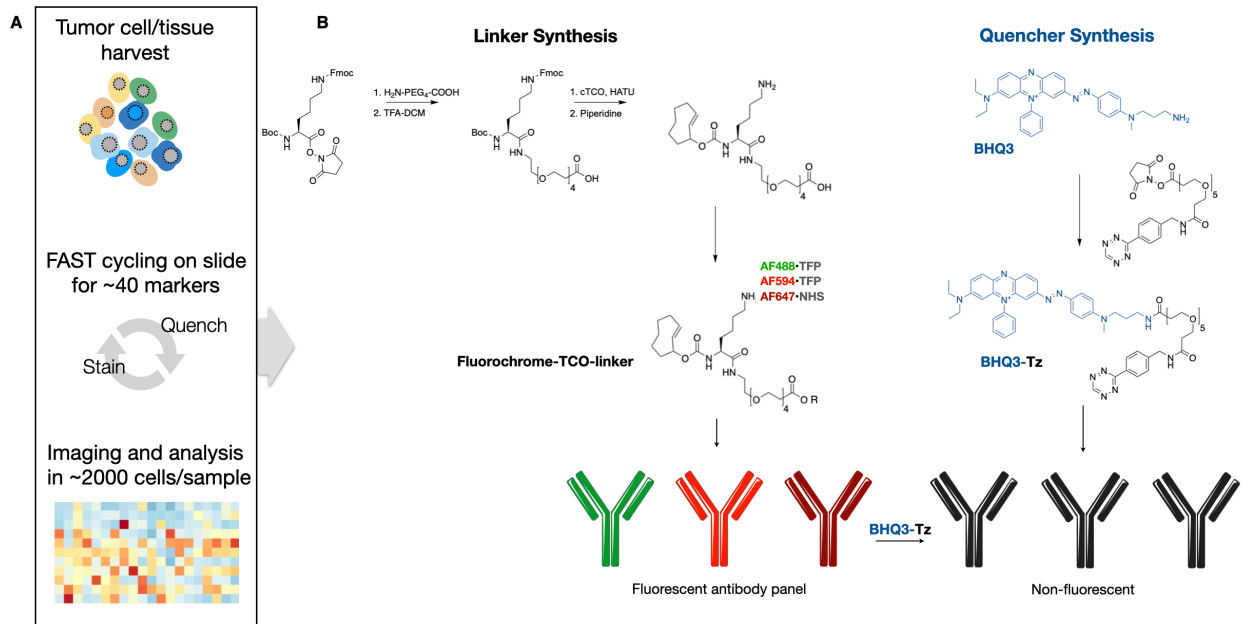

**Fig. S12: CANDI-uptake by tumor-associated immune cells. A.** Merged images of the CANDI signal (white, top) and the immune cell staining in **Fig. 6A** are shown (bottom). Cyan: TMEM119, green: CD11c, red: F4/80, magenta: GFAP. **B.** Another example of CANDI (white) uptake in different immune cell populations (green) in CT2A tumor (blue).

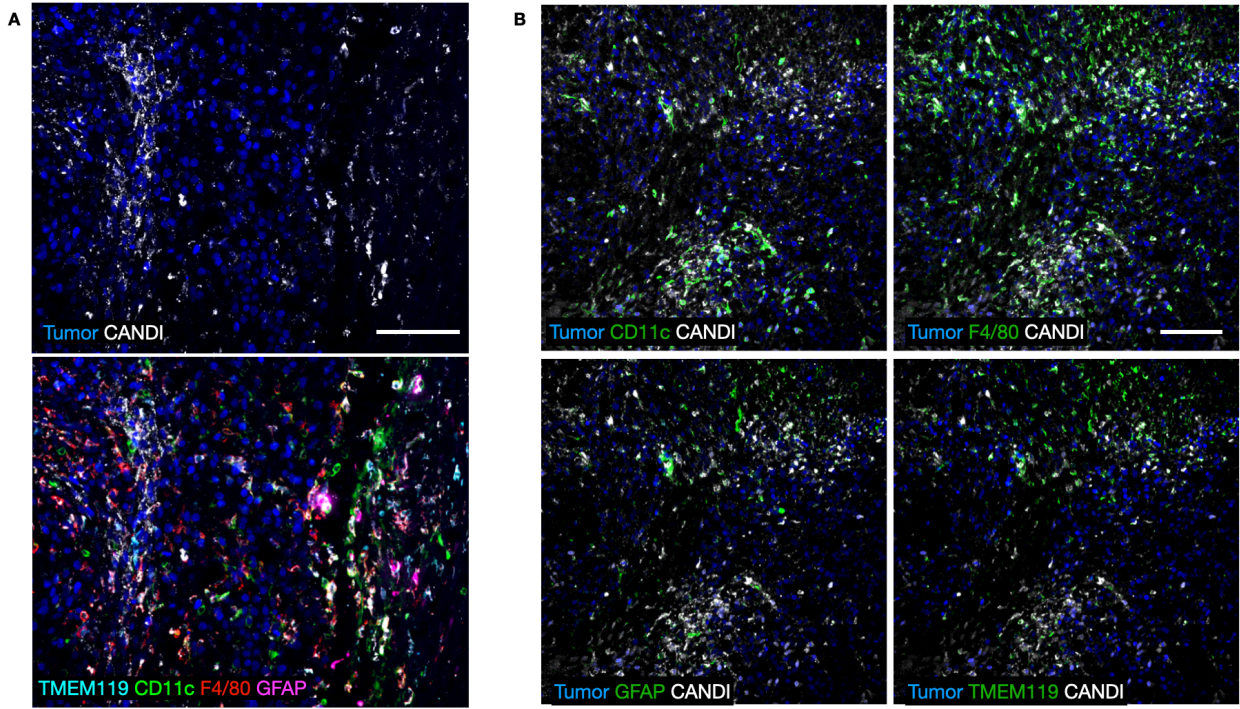

**Fig. S13: Bioluminescence imaging of treatment effects.** CT2A tumor-bearing mice were imaged by bioluminescence following IV administration of 5 mg of luciferin. Shown are six representative mice from the three treatment cohorts. For additional MR imaging, see **Fig. S12**.

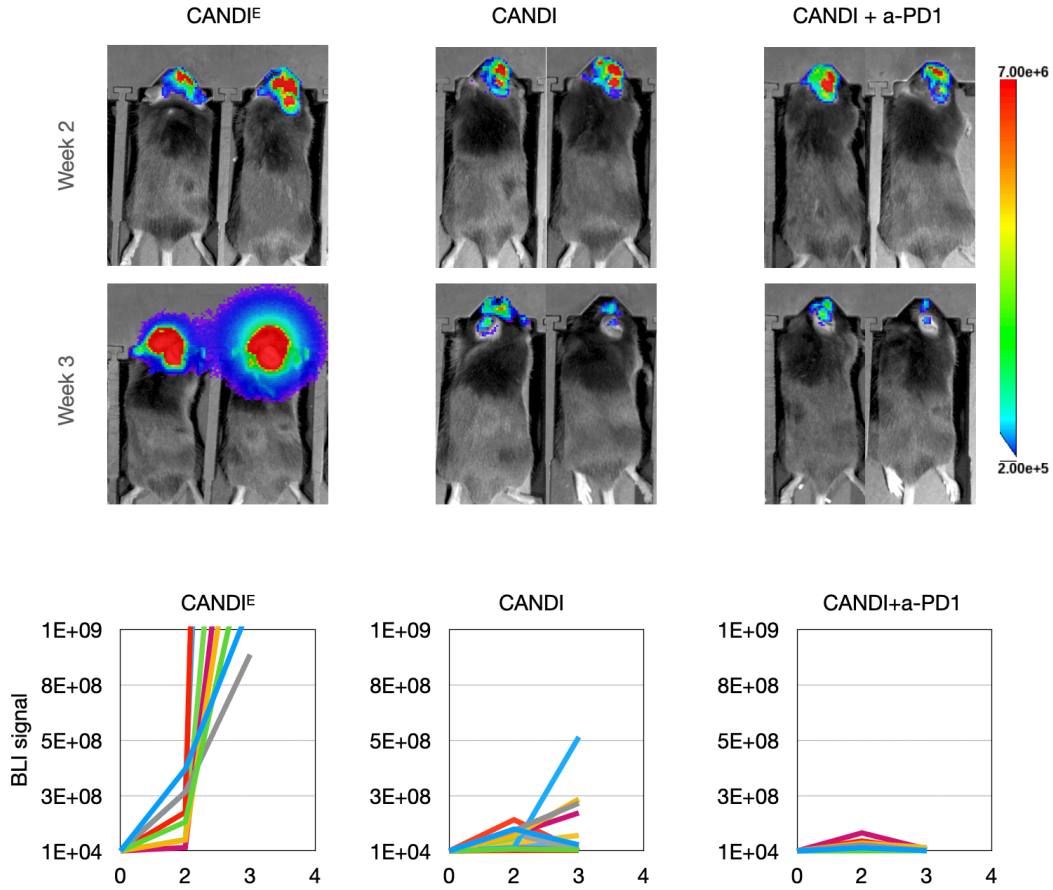

**Fig. S14: MR imaging of treatment effects.** T1W ( $\pm$  Gd) and T2 weighted MR images were obtained in 9 mice at weeks 2 (before treatment) and at week 3 after two treatments with either CANDIE, CANDI, or CANDI + a-PD1. Note the marked tumor differences in the latter cohort.

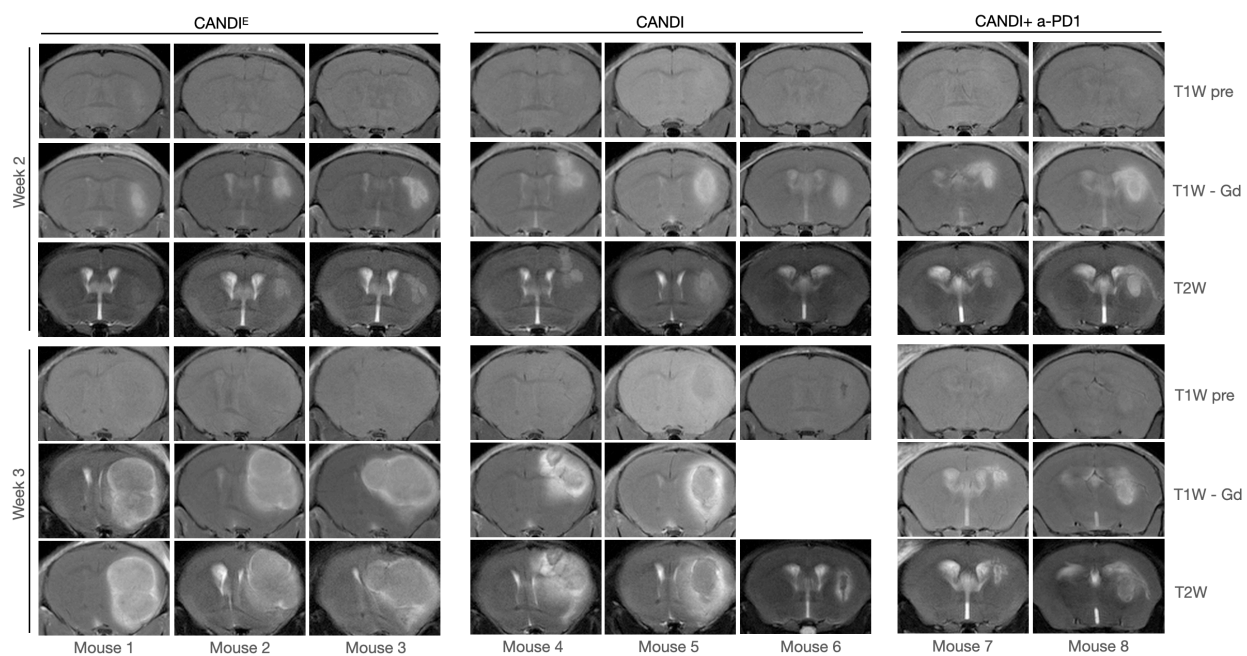

**Fig. S15: Toxicity. A.** There is no significant adverse effect of drug-loaded CANDI on body weight, unlike other immunostimulatory drugs (e.g., STING agonists). Tumor-bearing mice treated with a therapeutic dose of CANDI (N = 24). **B.** Effect of CANDI treatment on liver histology (representative images from mice injected with either CANDI or CANDI<sup>E</sup>, N = 10). Note the typical architecture and lack of vacuolization or immune cell infiltrates.

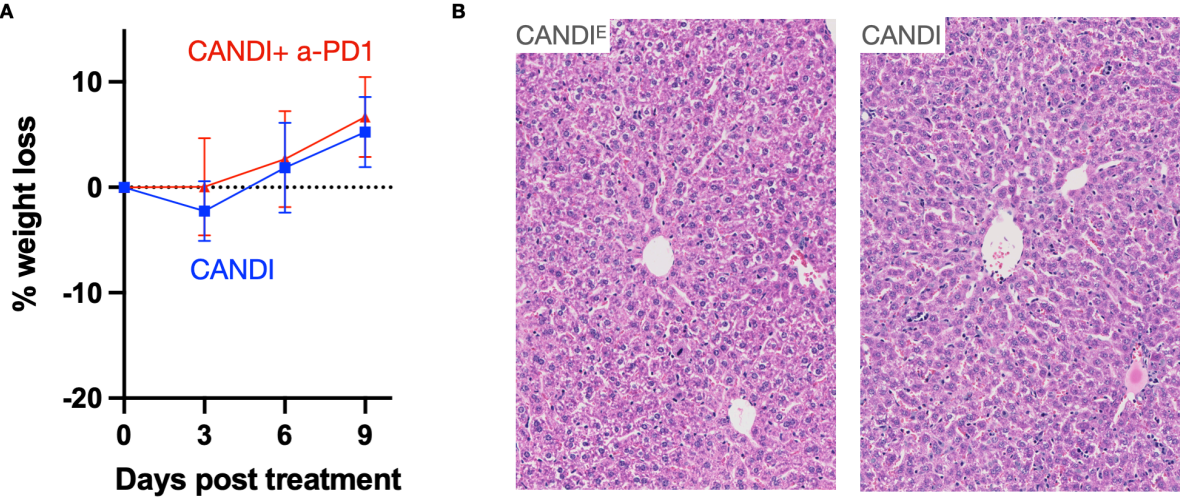



**Fig. S16: Effects of CANDI on IL-12 expression in GBM.** Intravital imaging was performed in the CT2A brain window model (red) of IL-12-eYFP reporter mice receiving CANDI (white). The top row shows CANDI distribution 2, 24, and 48 h after IV administration. The bottom row shows the IL-12 induction. After CANDI administration, many more cells are green in the tumor microenvironment. While both cell types can express IL-12, DC generally express more IL-12 than MF, however, DC are far less numerous in the tumor microenvironment compared to MF. Shown is one representative example of N = 6 mice tested; scale bars = 100  $\mu$ m.

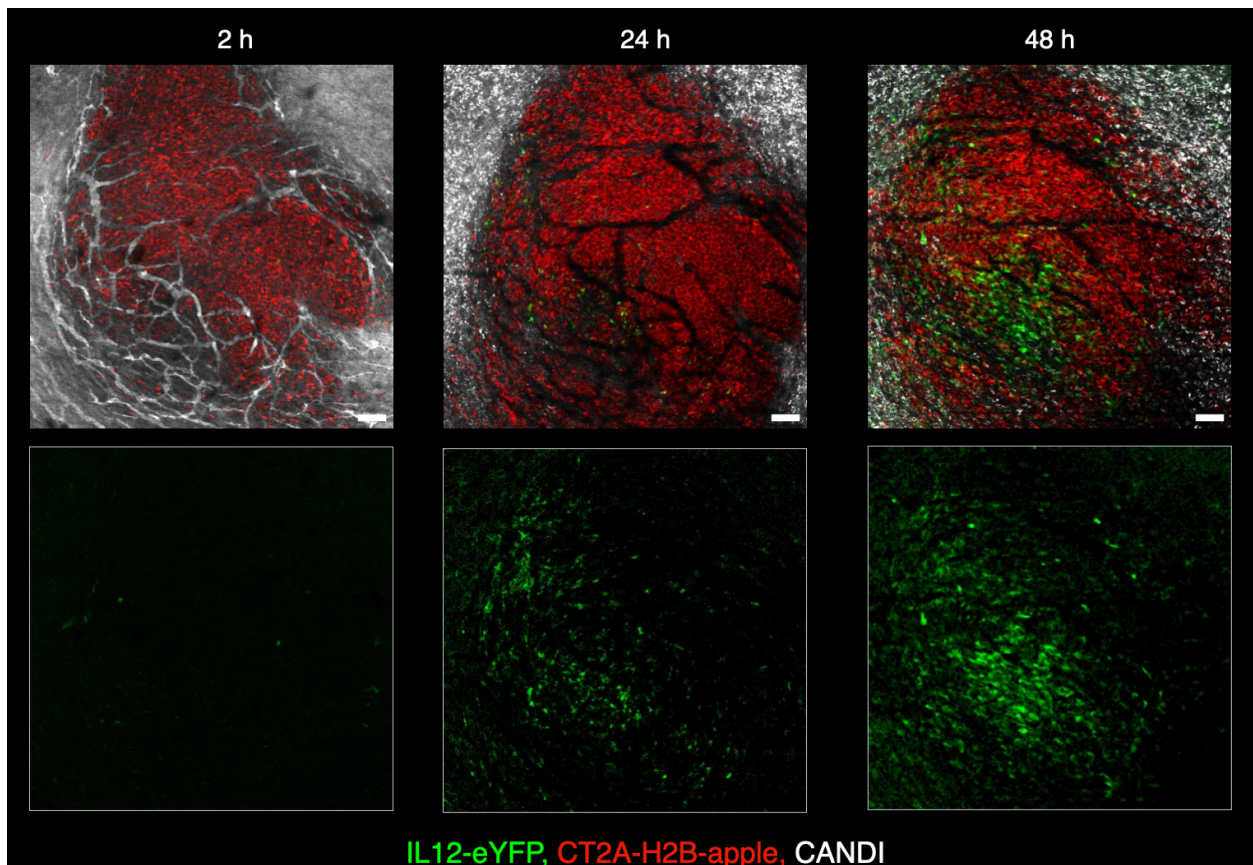

**Fig. S17: Effects of CANDI on IFNG expression in GBM.** Intravital imaging was performed in the CT2A brain window model (red) of IFNG-eYFP reporter mice (GREAT mice) receiving CANDI (white). The top row shows tumor growth. The bottom row shows CANDI distribution 24, 48, 72, and 96 h after IV administration. The middle row shows the IFNG induction. Note that many more cells are green in the tumor microenvironment after 96 days following CANDI administration. Shown is one representative example of N = 5 mice imaged; scale bar = 50  $\mu$ m. See **Movie 4** for longer time course and cell mobility.

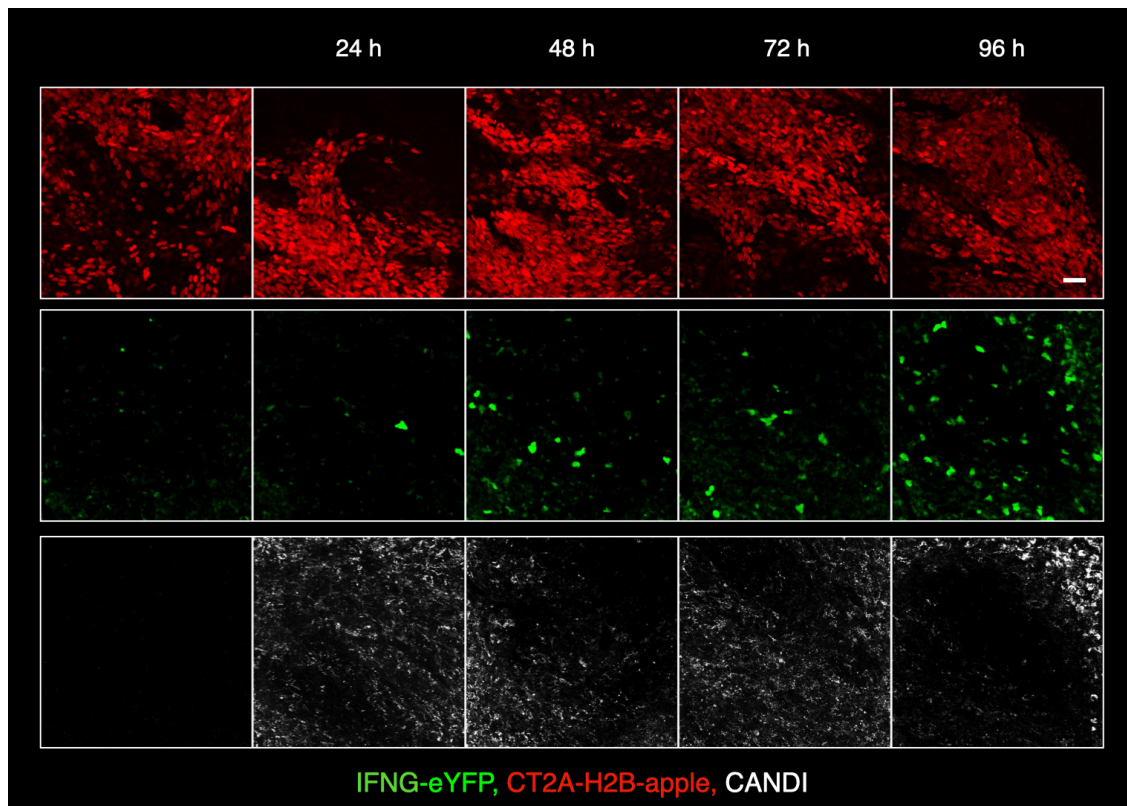



**Fig. S18: Modeling.** Systemic PK parameters were modeled to determine the relative advantages of CANDI complex small molecules for TAM delivery. The data was fit to published clinical blood PK data as detailed in **Tables S4**. As can be seen, CANDI encapsulation resulted in approximately 6 orders of magnitude higher tumoral concentrations of the small molecules at 1 day after systemic administration, and local drug concentrations remained stable for prolonged times.

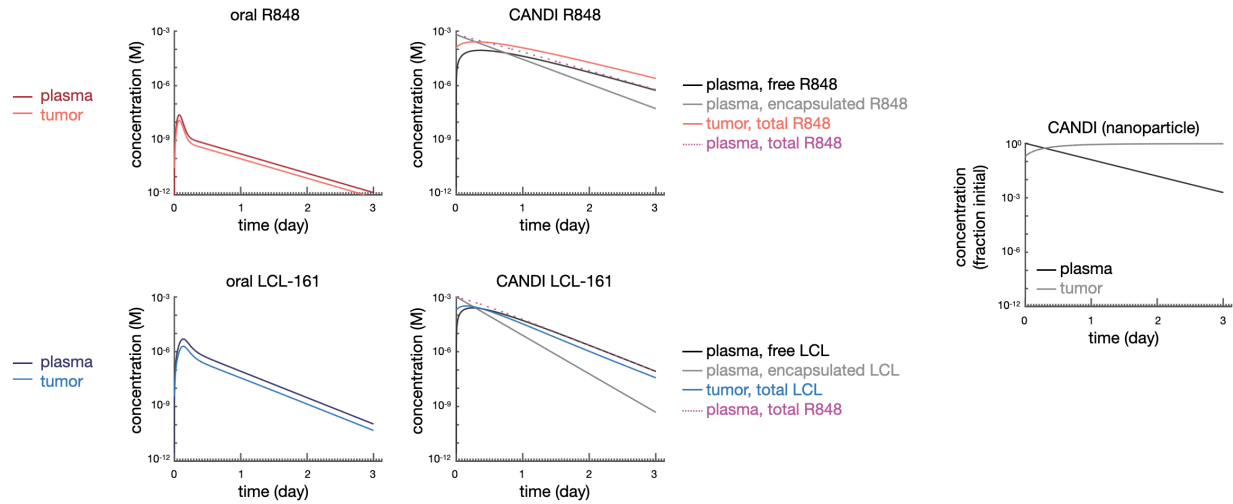

**TABLES****Table S1: FAST reagents for murine cyclic immunostaining**

| <b>Markers</b> | <b>Target population</b> | <b>Clone</b> | <b>Source</b> | <b>Catalog #</b> | <b>Dye</b> |
|----------------|--------------------------|--------------|---------------|------------------|------------|
| CD45           | Hematopoietic cells      | 104.2        | Bio X Cell    | BE0300           | AF488      |
| CD3            | T cells                  | 145-2C11     | Biologend     | 100322           | AF647      |
| CD8            | CD8+ T cells             | 53-6.7       | Biologend     | 100702           | AF647      |
| CD4            | CD4+ T cells             | RM4-5        | Biologend     | 100505           | AF488      |
| TMEM119        | Microglia                | 28-3         | Abcam         | AB209064         | AF647      |
| F4/80          | Macrophages              | Cl:A3-1      | Bio X Cell    | BE0206           | AF488      |
| CD11b          | Myeloid cells            | M1/70        | Bio X Cell    | BE007            | AF647      |
| CD11c          | Dendritic cells          | N418         | Biologend     | 117302           | AF647      |
| MHCII          | Various                  | M5/114       | Bio X Cell    | BE0108           | AF488      |
| PD-L1          | Various                  | Polyclonal   | R&D           | 135229           | AF488      |
| IL-12          | Various                  | 45806        | R&D           | MAB6688          | AF488      |

**Table S2: Antibodies for murine flow cytometry**

| Markers | Target population        | Clone       | Source         | Catalog #  | Dye          |
|---------|--------------------------|-------------|----------------|------------|--------------|
| Sirpa   | Myeloid cells            | P84         | Thermo Fisher  | 64-1721-80 | SB645        |
| CD40    | Antigen Presenting Cells | 3/23        | Biolegend      | 124626     | Pacific Blue |
| CD86    | Antigen Presenting Cells | GL-1        | Biolegend      | 105043     | BV785        |
| CD3e    | T cells                  | 145-2C11    | Thermo Fisher  | 15-0031-81 | PE-Cy5       |
| CD19    | B cells                  | 1D3         | Thermo Fisher  | 15-0193-81 | PE-Cy5       |
| B220    | T cells                  | RA3-6B2     | Thermo Fisher  | 15-452-81  | PE-Cy5       |
| NK1.1   | NK cells                 | PK136       | Biolegend      | 108716     | PE-Cy5       |
| XCR1    | Dendritic cells          | ZET         | Biolegend      | 148204     | PE           |
| CD11c   | Dendritic cells          | N418        | Thermo Fisher  | 61-0114-82 | PE-eF610     |
| CD45    | Hematopoietic cells      | 30-F11      | Thermo Fisher  | 56-0451-82 | AF700        |
| MHCII   | Antigen Presenting Cells | M5/114.15.2 | Thermo Fisher  | 47-5321-82 | APC-eF780    |
| PD1     | Various                  | RMP1-14     | Biolegend      | 114117     | PE           |
| CD3e    | T cells                  | 145-2C11    | Biolegend      | 100349     | Bv711        |
| CD8a    | CD8+ T cells             | 53-6.7      | BD Biosciences | 557668     | AF488        |
| CD4     | CD4+ T cells             | RM4-5       | BD Biosciences | 558107     | Pacific Blue |
| CD11b   | Myeloid cells            | M1/70       | BD Biosciences | 557397     | PE           |

**Table S3: Comparison of some carbohydrate based therapeutics with TAM targeting capabilities**

Table S3: Comparison of carbohydrate based therapeutics with TAM targeting capabilities

| Nanomaterial | Polymer      | Target cell | Size (nm) | Payload (mg drug)/ mg polymer | Payload type               | TAM localization | Therapeutics efficacy                     | Reference                      |
|--------------|--------------|-------------|-----------|-------------------------------|----------------------------|------------------|-------------------------------------------|--------------------------------|
| CANDI        | B-CD         | DC + TAM    | 37 ± 3.2  | 0.14                          | Dual and triple            | >500% ID/g       | GBM, some complete                        | This work                      |
| CDNP         | Cyclodextrin | TAM         | ~30       | 0.12                          | TLRa                       | 90% ID/g         | Flank tumor, growth retardation           | Nat Biomed Eng, 2018;2: 578    |
| Macrin       | Dextran      | TAM         | ~20       | 20 molecules/ NP              | Chelator                   | 20% ID/g         | Not tested                                | ACS Nano. 2018; 12 12015       |
| Ferumoxytol  | Dextran      | TAM         | 17-31     | 12 molecules/ NP              | Peptides                   |                  |                                           | Nano Lett, 2017;17: 7160       |
| Ferumoxytol  | Dextran      | TAM         | 17-31     | ~100 molecules/ NP            | Taxol, Doxorubicin         |                  | Growth retardation                        | Nat Comm. 2014;5:3384          |
| CHP:LPA      | Pullulan     | TAM         | ~40       | ~0.03                         | Long peptide antigen (LPA) |                  | Flank tumor sensitized to adaptive immune | J. Clin. Invest;2019 ;129;1278 |

**Tables S4: Pharmacokinetic parameters used for modeling.** For references see<sup>[34-36,65,66]</sup>

| Parameter                 | LCL-161 single agent | Notes                                |
|---------------------------|----------------------|--------------------------------------|
| Dose                      | 25 mg/kg             | J Clin Oncol. 2014;32(28):3103-3110. |
| C <sub>max</sub>          | 2,350 ng / mL        | J Clin Oncol. 2014;32(28):3103-3110. |
| AUC <sub>plasma</sub>     | 32,081 ng hr / mL    | J Clin Oncol. 2014;32(28):3103-3110. |
| t <sub>1/2 terminal</sub> | 5 hr                 | J Clin Oncol. 2014;32(28):3103-3110. |
| K <sub>d</sub>            | 90 nM                | J Med Chem. 2018;61(14):6350-6363.   |

| Parameter                 | R848 single agent | Notes                               |
|---------------------------|-------------------|-------------------------------------|
| Dose                      | 0.02 mg/kg        | J Hepatol. 2007;47(2):174-182.      |
| C <sub>max</sub>          | 7.5 ng / mL       | J Hepatol. 2007;47(2):174-182.      |
| AUC <sub>plasma</sub>     | 45 ng hr / mL     | J Hepatol. 2007;47(2):174-182.      |
| t <sub>1/2 terminal</sub> | 6.8 hr            | J Hepatol. 2007;47(2):174-182.      |
| K <sub>d</sub>            | 30 nM             | Theranostics. 2019;9(26):8426-8436. |

|                                  | CANDI dual agent                                   |          |                                                                     |
|----------------------------------|----------------------------------------------------|----------|---------------------------------------------------------------------|
| Parameter                        | LCL-161                                            | R848     | Notes                                                               |
| Dose                             | 25 mg/kg                                           | 10 mg/kg | This paper                                                          |
| NP release rate t <sub>1/2</sub> | 6 hr                                               | 16 hr    | This paper                                                          |
| NP t <sub>1/2</sub>              | 8 hr                                               |          | Approximated from NCT04843891                                       |
| NP % ID/g tumor                  | ~100                                               |          | Approximated from intravital microscopy (this paper)                |
| NP D <sub>eff</sub>              | 1x10 <sup>-7</sup> cm <sup>2</sup> s <sup>-1</sup> |          | Approximated from albumin, see <i>Sci Adv.</i> 2022;8(17):eabl6339. |
| NP Permeability                  | 2x10 <sup>-7</sup> cm s <sup>-1</sup>              |          | Approximated from albumin, see <i>Sci Adv.</i> 2022;8(17):eabl6339. |
| Cellular NP uptake               | 0.007 min <sup>-1</sup>                            |          | Fit to ID/g, this paper (intravital)                                |
